# Supplementary material
Source: PubMed Central journal article supplement (PMC2519685)

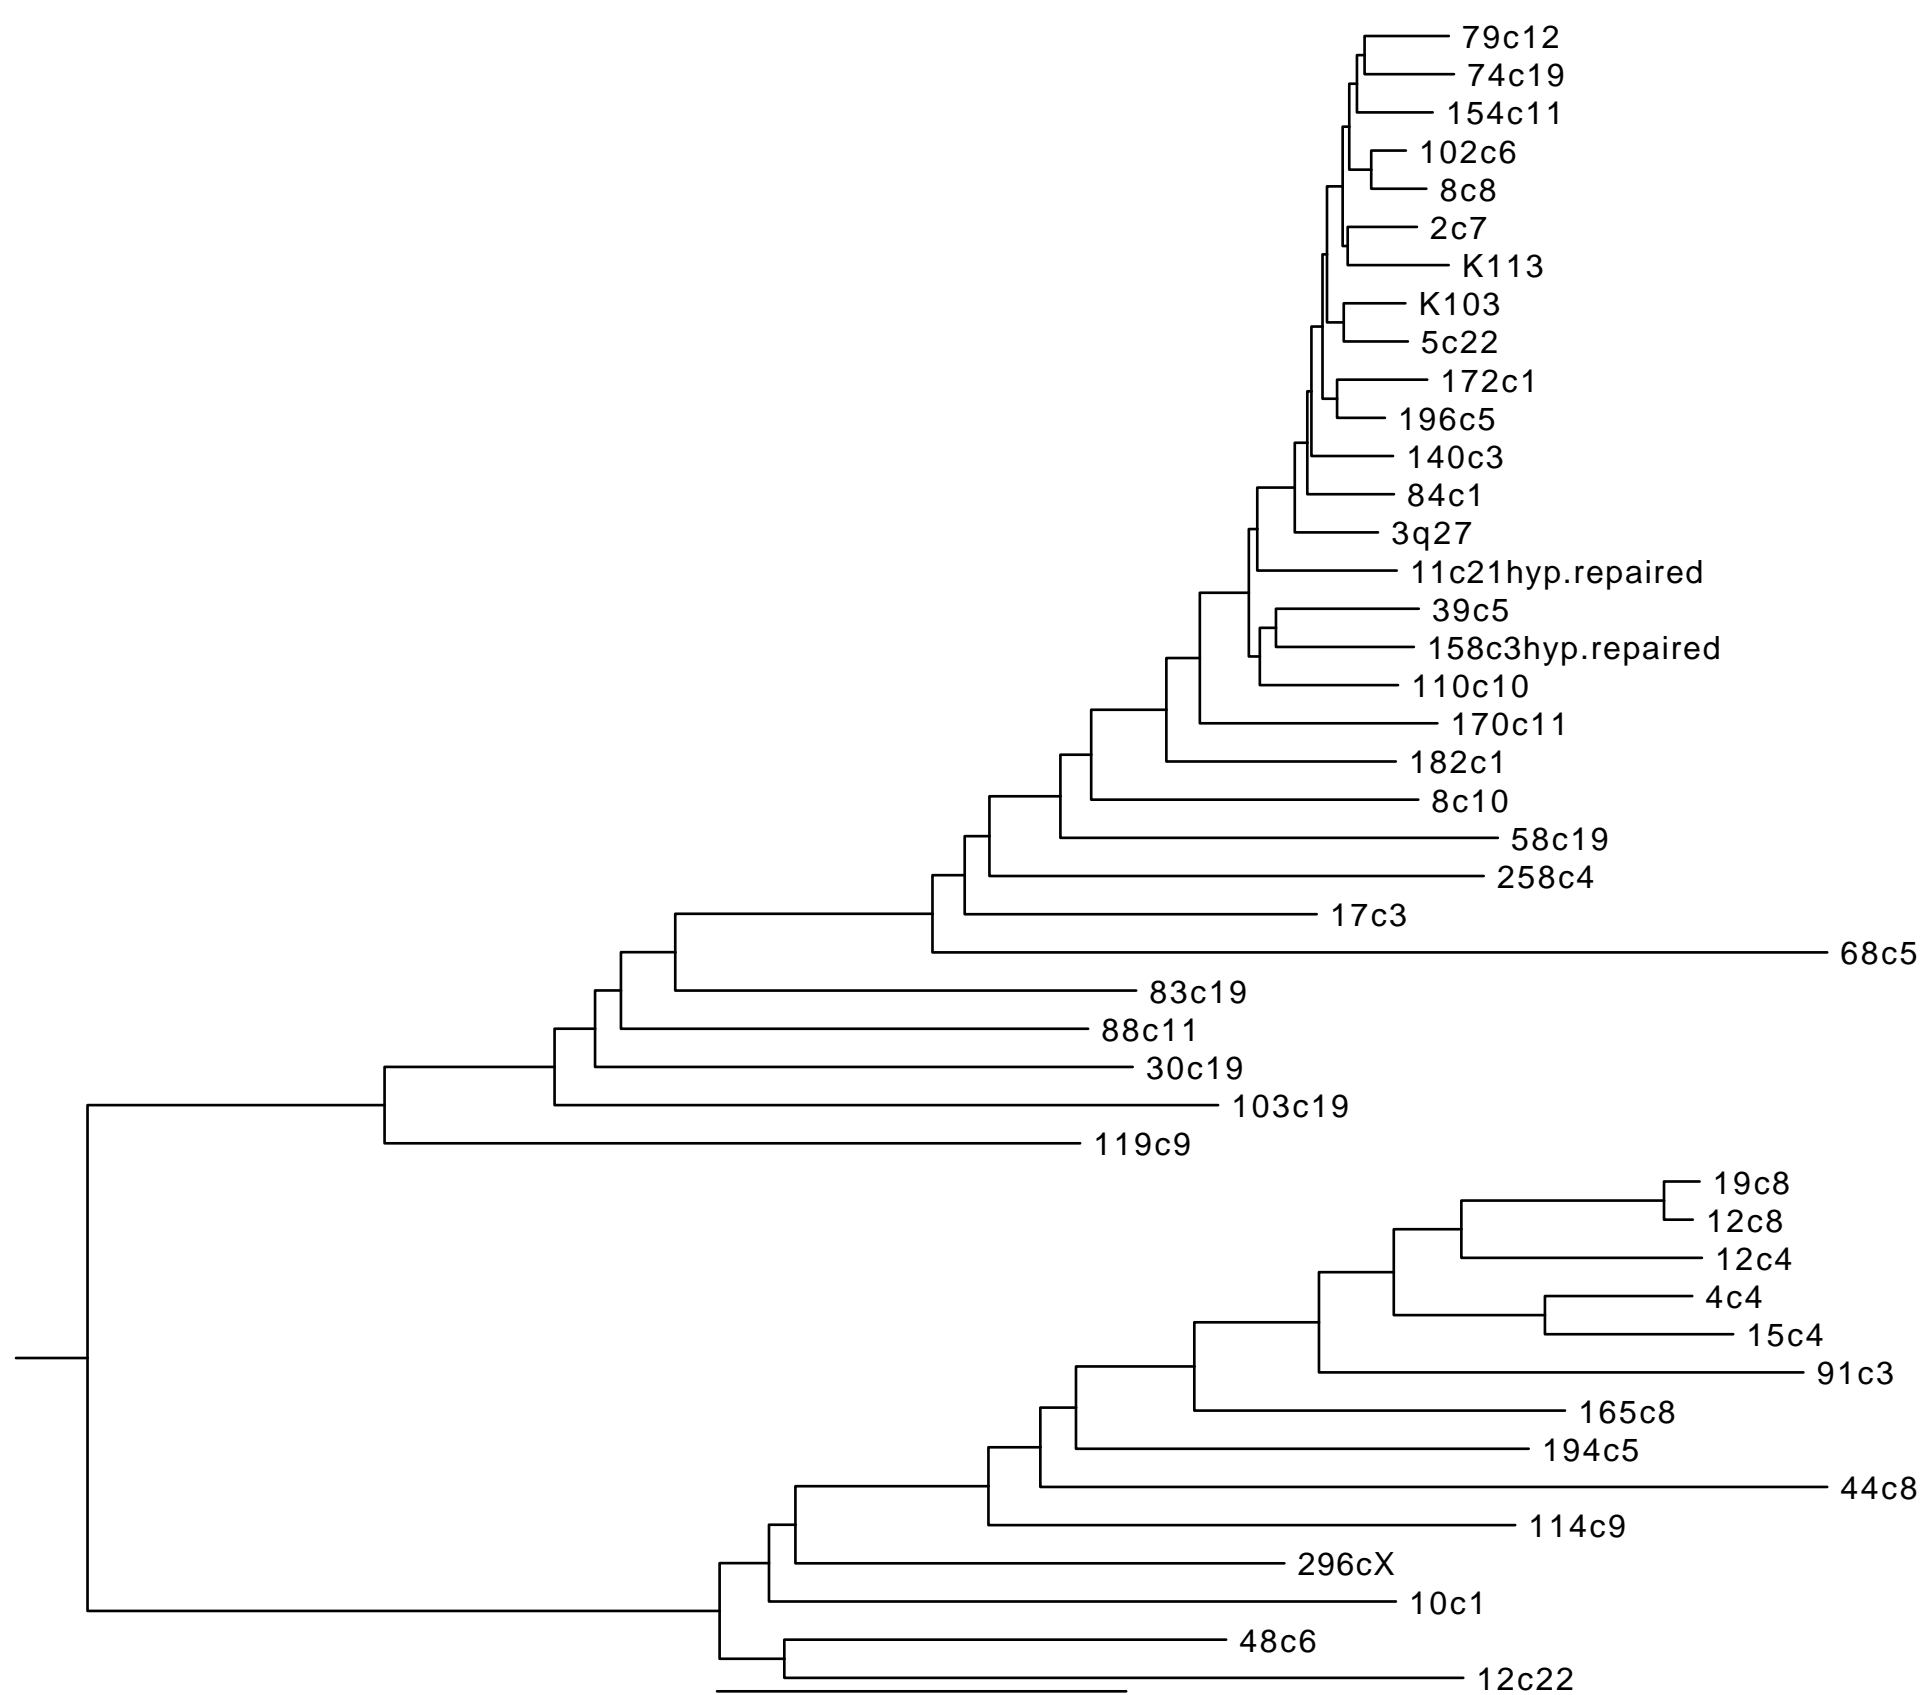

0.03

Supplement: supp_82_17_8743__1.pdf [file supp_82_17_8743__1.pdf]
